# Supplementary material
Source: publisher figshare collection journal article supplement (https://sage.figshare.com/ndownloader/files/22661321)

## Supplemental File 1: Study Flow Diagram

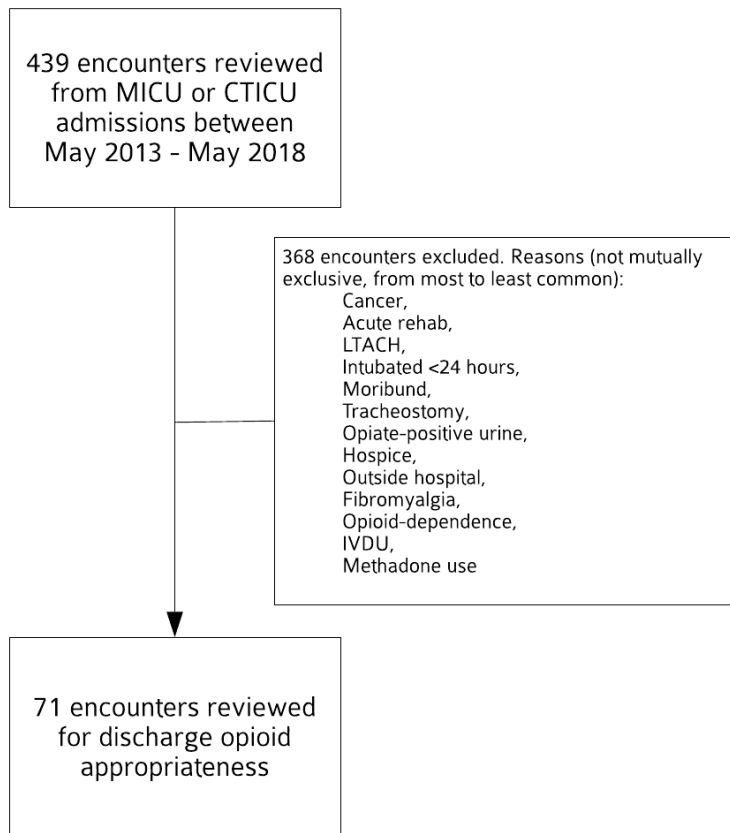

Supplement: Supplementary file 1 [file 22661321]
